# Supplementary material for: Consensus map integration and QTL meta-analysis narrowed a locus for yield traits to 0.7 cM and refined a region for late leaf spot resistance traits to 0.38 cM on linkage group A05 in peanut (Arachis hypogaea L.)
Source: BMC Genomics. 2018 Dec 7;19:887. doi: 10.1186/s12864-018-5288-3 (PMC6286586; doi:10.1186/s12864-018-5288-3)
Supplement: Supplementary file 7 — Table S5. Summary of 38 candidate genes of cluster CMQTL7 for yield related traits. (XLSX 16 kb) [file 12864_2018_5288_MOESM7_ESM.xlsx]

## Sheet: CMQTL7_Yield_Candidate gene
Table S5. Summary of 38 candidate genes of cluster CMQTL7 for yield related traits.
Candidate gene ID	Transcript name	Location	Start	End	Note	Homologous in Arachis duranensis V14167 (Bertioli et al., 2016)	Query cover (%)	Identity (%)	E-value	Note
1	Arahy.MG2K2N	Arahy.05	105738533	105738896	solute carrier family 25 member 44-like [Glycine max]; IPR018108 (Mitochondrial substrate/solute carrier), IPR023395 (Mitochondrial carrier domain)
2	Arahy.DW27I3	Arahy.05	105756050	105760508	exostosin-2-like [Glycine max]; IPR004263 (Exostosin-like), IPR015338 (EXTL2, alpha-1,4-N-acetylhexosaminyltransferase); GO:0031227 (intrinsic component of endoplasmic reticulum membrane)	Aradu.M7YGM	73	100	0	exostosin-2-like [Glycine max]; IPR004263 (Exostosin-like), IPR015338 (EXTL2, alpha-1,4-N acetylhexosaminyltransferase); GO:0031227 (intrinsic component of endoplasmic reticulum membrane)
3	Arahy.G1FX5D	Arahy.05	105813545	105816327	Replication factor-A protein 1-related; IPR012340 (Nucleic acid-binding, OB-fold)
4	Arahy.EXNL9P	Arahy.05	105842061	105845005	branched-chain-amino-acid aminotransferase-like protein; IPR001544 (Aminotransferase, class IV); GO:0003824 (catalytic activity), GO:0008152 (metabolic process)
4	Arahy.EXNL9P	Arahy.05	105842061	105845005	branched-chain-amino-acid aminotransferase-like protein; IPR001544 (Aminotransferase, class IV); GO:0003824 (catalytic activity), GO:0008152 (metabolic process)
4	Arahy.EXNL9P	Arahy.05	105842061	105845005	branched-chain-amino-acid aminotransferase-like protein; IPR001544 (Aminotransferase, class IV); GO:0003824 (catalytic activity), GO:0008152 (metabolic process)
5	Arahy.PEM48P	Arahy.05	105846107	105848891	Replication factor-A protein 1-related; IPR012340 (Nucleic acid-binding, OB-fold)
5	Arahy.PEM48P	Arahy.05	105846107	105848891	Replication factor-A protein 1-related; IPR012340 (Nucleic acid-binding, OB-fold)
6	Arahy.QL12SG	Arahy.05	105891824	105894665	DNA-binding protein n=1 Tax=Catharanthus roseus RepID=A1DR77_CATRO; IPR003106 (Leucine zipper, homeobox-associated), IPR009057 (Homeodomain-like); GO:0000976 (transcription regulatory region sequence-specific DNA binding), GO:0003677 (DNA binding), GO:0003700 (sequence-specific DNA binding transcription factor activity), GO:0005634 (nucleus), GO:0043565 (sequence-specific DNA binding)	Aradu.PSF4U	100	100	0	DNA-binding protein n=1 Tax=Catharanthus roseus RepID=A1DR77_CATRO; IPR003106 (Leucine zipper, homeobox-associated), IPR009057 (Homeodomain-like); GO:0000976 (transcription regulatory region sequence-specific DNA binding), GO:0003677 (DNA binding), GO:0003700 (sequence-specific DNA binding transcription factor activity), GO:0005634 (nucleus), GO:0043565 (sequence-specific DNA binding)
7	Arahy.50RNEG	Arahy.05	105896361	105899640	methyl-CPG-binding domain 9
8	Arahy.GR7XEI	Arahy.05	105913469	105917050	DNA-binding protein n=1 Tax=Catharanthus roseus RepID=A1DR77_CATRO; IPR003106 (Leucine zipper, homeobox-associated), IPR009057 (Homeodomain-like); GO:0000976 (transcription regulatory region sequence-specific DNA binding), GO:0003677 (DNA binding), GO:0003700 (sequence-specific DNA binding transcription factor activity), GO:0005634 (nucleus), GO:0043565 (sequence-specific DNA binding)
9	Arahy.S45US4	Arahy.05	105913787	105929178	methyl-CpG-binding domain-containing protein 9-like isoform X2 [Glycine max]; IPR001487 (Bromodomain), IPR003888 (FY-rich, N-terminal), IPR013083 (Zinc finger, RING/FYVE/PHD-type), IPR016177 (DNA-binding domain); GO:0003677 (DNA binding), GO:0005515 (protein binding), GO:0005634 (nucleus), GO:0008270 (zinc ion binding)
9	Arahy.S45US4	Arahy.05	105913787	105929178	methyl-CpG-binding domain-containing protein 9-like isoform X2 [Glycine max]; IPR001487 (Bromodomain), IPR003888 (FY-rich, N-terminal), IPR013083 (Zinc finger, RING/FYVE/PHD-type), IPR016177 (DNA-binding domain); GO:0003677 (DNA binding), GO:0005515 (protein binding), GO:0005634 (nucleus), GO:0008270 (zinc ion binding)
9	Arahy.S45US4	Arahy.05	105913787	105929178	methyl-CpG-binding domain-containing protein 9-like isoform X2 [Glycine max]; IPR001487 (Bromodomain), IPR003888 (FY-rich, N-terminal), IPR013083 (Zinc finger, RING/FYVE/PHD-type), IPR016177 (DNA-binding domain); GO:0003677 (DNA binding), GO:0005515 (protein binding), GO:0005634 (nucleus), GO:0008270 (zinc ion binding)
9	Arahy.S45US4	Arahy.05	105913787	105929178	methyl-CpG-binding domain-containing protein 9-like isoform X2 [Glycine max]; IPR001487 (Bromodomain), IPR003888 (FY-rich, N-terminal), IPR013083 (Zinc finger, RING/FYVE/PHD-type), IPR016177 (DNA-binding domain); GO:0003677 (DNA binding), GO:0005515 (protein binding), GO:0005634 (nucleus), GO:0008270 (zinc ion binding)
10	Arahy.2AN4H0	Arahy.05	105934857	105936026	putative nuclease HARBI1-like [Glycine max]; IPR026103 (Harbinger transposase-derived nuclease), IPR027806 (Harbinger transposase-derived nuclease domain)
11	Arahy.A204UU	Arahy.05	105960316	105964419	ARM repeat superfamily protein; IPR016024 (Armadillo-type fold), IPR024395 (CLASP N-terminal domain); GO:0005488 (binding)
11	Arahy.A204UU	Arahy.05	105960316	105964419	ARM repeat superfamily protein; IPR016024 (Armadillo-type fold), IPR024395 (CLASP N-terminal domain); GO:0005488 (binding)	Aradu.EG28Y	50	100	0	ARM repeat superfamily protein; IPR016024 (Armadillo-type fold), IPR024395 (CLASP N-terminal domain); GO:0005488 (binding)
11	Arahy.A204UU	Arahy.05	105960316	105964419	ARM repeat superfamily protein; IPR016024 (Armadillo-type fold), IPR024395 (CLASP N-terminal domain); GO:0005488 (binding)
12	Arahy.5IT82G	Arahy.05	105976703	105978811	VMA21-like domain protein; IPR019013 (Vacuolar ATPase assembly integral membrane protein VMA21-like domain)
13	Arahy.ZVYX7T	Arahy.05	105979634	105981994	Unknown protein
14	Arahy.CK2LDM	Arahy.05	105990453	105995218	ZIP zinc/iron transport family protein; IPR003689 (Zinc/iron permease); GO:0005385 (zinc ion transmembrane transporter activity), GO:0016020 (membrane), GO:0016021 (integral component of membrane), GO:0030001 (metal ion transport), GO:0046873 (metal ion transmembrane transporter activity), GO:0055085 (transmembrane transport), GO:0071577 (zinc ion transmembrane transport)	Aradu.9T8AF	83	100	0	ZIP zinc/iron transport family protein; IPR003689 (Zinc/iron permease); GO:0005385 (zinc ion transmembrane transporter activity), GO:0016020 (membrane), GO:0016021 (integral component of membrane), GO:0030001 (metal ion transport), GO:0046873 (metal ion transmembrane transporter activity), GO:0055085 (transmembrane transport), GO:0071577 (zinc ion transmembrane transport)
14	Arahy.CK2LDM	Arahy.05	105990453	105995218	ZIP zinc/iron transport family protein; IPR003689 (Zinc/iron permease); GO:0005385 (zinc ion transmembrane transporter activity), GO:0016020 (membrane), GO:0016021 (integral component of membrane), GO:0030001 (metal ion transport), GO:0046873 (metal ion transmembrane transporter activity), GO:0055085 (transmembrane transport), GO:0071577 (zinc ion transmembrane transport)
15	Arahy.TQF6LQ	Arahy.05	106016257	106018741	Unknown protein
16	Arahy.8CP0UI	Arahy.05	106050478	106054335	aldehyde dehydrogenase family 2 member C4-like [Glycine max]; IPR016161 (Aldehyde/histidinol dehydrogenase); GO:0008152 (metabolic process), GO:0016491 (oxidoreductase activity), GO:0055114 (oxidation-reduction process)	Aradu.MTS9G	81	100	0	aldehyde dehydrogenase family 2 member C4-like [Glycine max]; IPR016161 (Aldehyde/histidinol dehydrogenase); GO:0008152 (metabolic process), GO:0016491 (oxidoreductase activity), GO:0055114 (oxidation-reduction process)
17	Arahy.J4K9CJ	Arahy.05	106064931	106068541	ATP-binding ABC transporter; IPR027417 (P-loop containing nucleoside triphosphate hydrolase); GO:0000166 (nucleotide binding), GO:0005524 (ATP binding), GO:0016887 (ATPase activity), GO:0017111 (nucleoside-triphosphatase activity)
18	Arahy.0S9GR8	Arahy.05	106119622	106125375	Potassium transporter family protein; IPR003855 (K+ potassium transporter); GO:0015079 (potassium ion transmembrane transporter activity), GO:0016020 (membrane), GO:0071805 (potassium ion transmembrane transport)
18	Arahy.0S9GR8	Arahy.05	106119622	106125375	Potassium transporter family protein; IPR003855 (K+ potassium transporter); GO:0015079 (potassium ion transmembrane transporter activity), GO:0016020 (membrane), GO:0071805 (potassium ion transmembrane transport)
19	Arahy.PIY0Y7	Arahy.05	106139480	106140262	uncharacterized protein LOC100814604 isoform X3 [Glycine max]; IPR012337 (Ribonuclease H-like domain); GO:0003676 (nucleic acid binding)
20	Arahy.B4IVD6	Arahy.05	106145700	106150365	NHL domain-containing protein; IPR011042 (Six-bladed beta-propeller, TolB-like)
20	Arahy.B4IVD6	Arahy.05	106145700	106150365	NHL domain-containing protein; IPR011042 (Six-bladed beta-propeller, TolB-like)
21	Arahy.AE8MNQ	Arahy.05	106166190	106168505	NHL domain-containing protein
22	Arahy.7T15I2	Arahy.05	106176739	106178634	Ycf2 [Glycine max]; IPR008543 (Uncharacterised protein family Ycf2); GO:0005524 (ATP binding), GO:0009507 (chloroplast)
23	Arahy.AYUG02	Arahy.05	106178953	106180101	RING/U-box superfamily protein; IPR013083 (Zinc finger, RING/FYVE/PHD-type); GO:0005515 (protein binding), GO:0008270 (zinc ion binding)
24	Arahy.JBB1UJ	Arahy.05	106188820	106191197	Unknown protein	Aradu.WX9EY	76	100	0	Unknown protein; IPR001568 (Ribonuclease T2-like); GO:0003723 (RNA binding), GO:0033897 (ribonuclease T2 activity)
25	Arahy.BW4FX3	Arahy.05	106200006	106206962	nodulin MtN21 /EamA-like transporter family protein; IPR000620 (Drug/metabolite transporter); GO:0016020 (membrane)
25	Arahy.BW4FX3	Arahy.05	106200006	106206962	nodulin MtN21 /EamA-like transporter family protein; IPR000620 (Drug/metabolite transporter); GO:0016020 (membrane)
26	Arahy.68ICNY	Arahy.05	106219336	106222826	nodulin MtN21 /EamA-like transporter family protein; IPR000620 (Drug/metabolite transporter); GO:0016020 (membrane)
26	Arahy.68ICNY	Arahy.05	106219336	106222826	nodulin MtN21 /EamA-like transporter family protein; IPR000620 (Drug/metabolite transporter); GO:0016020 (membrane)
27	Arahy.UC4N4Q	Arahy.05	106235750	106239887	phosphoribosylglycinamide formyltransferase; IPR004607 (Phosphoribosylglycinamide formyltransferase); GO:0004644 (phosphoribosylglycinamide formyltransferase activity), GO:0006189 ('de novo' IMP biosynthetic process), GO:0008168 (methyltransferase activity), GO:0009058 (biosynthetic process)
27	Arahy.UC4N4Q	Arahy.05	106235750	106239887	phosphoribosylglycinamide formyltransferase; IPR004607 (Phosphoribosylglycinamide formyltransferase); GO:0004644 (phosphoribosylglycinamide formyltransferase activity), GO:0006189 ('de novo' IMP biosynthetic process), GO:0008168 (methyltransferase activity), GO:0009058 (biosynthetic process)
27	Arahy.UC4N4Q	Arahy.05	106235750	106239887	phosphoribosylglycinamide formyltransferase; IPR004607 (Phosphoribosylglycinamide formyltransferase); GO:0004644 (phosphoribosylglycinamide formyltransferase activity), GO:0006189 ('de novo' IMP biosynthetic process), GO:0008168 (methyltransferase activity), GO:0009058 (biosynthetic process)
28	Arahy.FZFZ2S	Arahy.05	106256254	106257334	uncharacterized protein LOC102665802 [Glycine max]; IPR012337 (Ribonuclease H-like domain); GO:0003676 (nucleic acid binding)
29	Arahy.MY48C3	Arahy.05	106263421	106264772	transmembrane protein, putative
30	Arahy.25S2F8	Arahy.05	106266801	106278113	uncharacterized protein LOC100788705 [Glycine max]
31	Arahy.N6QIR7	Arahy.05	106282587	106292571	alpha dioxygenase; IPR010255 (Haem peroxidase); GO:0004601 (peroxidase activity), GO:0006979 (response to oxidative stress), GO:0020037 (heme binding), GO:0055114 (oxidation-reduction process)	Aradu.Y3QBI	98	100	0	alpha dioxygenase; IPR010255 (Haem peroxidase); GO:0004601 (peroxidase activity), GO:0006979 (response to oxidative stress), GO:0020037 (heme binding), GO:0055114 (oxidation-reduction process)
32	Arahy.30RAY8	Arahy.05	106305249	106308555	Peroxidase superfamily protein; IPR010255 (Haem peroxidase); GO:0004601 (peroxidase activity), GO:0006979 (response to oxidative stress), GO:0020037 (heme binding), GO:0055114 (oxidation-reduction process)
33	Arahy.326DW3	Arahy.05	106338660	106347240	Peroxidase superfamily protein; IPR010255 (Haem peroxidase); GO:0004601 (peroxidase activity), GO:0006979 (response to oxidative stress), GO:0020037 (heme binding), GO:0055114 (oxidation-reduction process)
33	Arahy.326DW3	Arahy.05	106338660	106347240	Peroxidase superfamily protein; IPR010255 (Haem peroxidase); GO:0004601 (peroxidase activity), GO:0006979 (response to oxidative stress), GO:0020037 (heme binding), GO:0055114 (oxidation-reduction process)
34	Arahy.00V694	Arahy.05	106358896	106359336	uncharacterized protein LOC100794155 isoform X2 [Glycine max]
35	Arahy.0KD7N0	Arahy.05	106359460	106362237	uncharacterized protein LOC102669061 [Glycine max]; IPR008906 (HAT dimerisation domain, C-terminal), IPR012337 (Ribonuclease H-like domain); GO:0003676 (nucleic acid binding), GO:0046983 (protein dimerization activity)
36	Arahy.MDT0NR	Arahy.05	106370098	106382265	protein YLS7-like [Glycine max]; IPR025846 (PMR5 N-terminal domain), IPR026057 (PC-Esterase)
37	Arahy.7T3N35	Arahy.05	106384783	106392921	J domain-containing protein DDB_G0295729-like isoform X2 [Glycine max]; IPR001025 (Bromo adjacent homology (BAH) domain), IPR017923 (Transcription factor IIS, N-terminal); GO:0003677 (DNA binding), GO:0003682 (chromatin binding), GO:0005634 (nucleus)	Aradu.TWC9B	71	100	0	J domain-containing protein DDB_G0295729-like isoform X2 [Glycine max]; IPR001025 (Bromo adjacent homology (BAH) domain), IPR017923 (Transcription factor IIS, N-terminal); GO:0003677 (DNA binding), GO:0003682 (chromatin binding), GO:0005634 (nucleus)
38	Arahy.L1PMVE	Arahy.05	106406260	106412461	J domain-containing protein DDB_G0295729-like isoform X2 [Glycine max]; IPR001025 (Bromo adjacent homology (BAH) domain), IPR017923 (Transcription factor IIS, N-terminal); GO:0003677 (DNA binding), GO:0003682 (chromatin binding), GO:0005634 (nucleus)	Aradu.C2I2I	91	100	0	J domain-containing protein DDB_G0295729-like isoform X2 [Glycine max]; IPR001025 (Bromo adjacent homology (BAH) domain), IPR017923 (Transcription factor IIS, N-terminal); GO:0003677 (DNA binding), GO:0003682 (chromatin binding), GO:0005634 (nucleus)
Bertioli DJ, et al. The genome sequences of Arachis duranensis and Arachis ipaensis, the diploid ancestors of cultivated peanut. Nat Genet. 2016;48:438-446.
